# Supplementary material for: Conjugated alternating copolymer of dialkylquaterthiophene and fluorenone: synthesis, characterisation and photovoltaic properties
Source: Royal Society of Chemistry journal article supplement (doi:10.1039/b708372f), 2007-01-01

## Supporting Information

### Conjugated alternating copolymer of dialkylquaterthiophene and fluorenone: synthesis, characterisation and photovoltaic properties.

By *Renaud Demadrille\**, *Nicolas Delbosc*, *Yann Kervella*, *Muriel Firon*, *Rémi De Bettignies*,

*Martial Billon*, *Patrice Rannou* and *Adam Pron*

#### Fluorescence quenching in solution by PCBM.

The fluorescence spectra were recorded on a HITACHI F4500 spectrophotometer. The wavelength of excitation was  $\lambda_{\text{ex}} = 430\text{nm}$ .

The solutions were prepared from anhydrous chlorobenzene purchased from Acros.

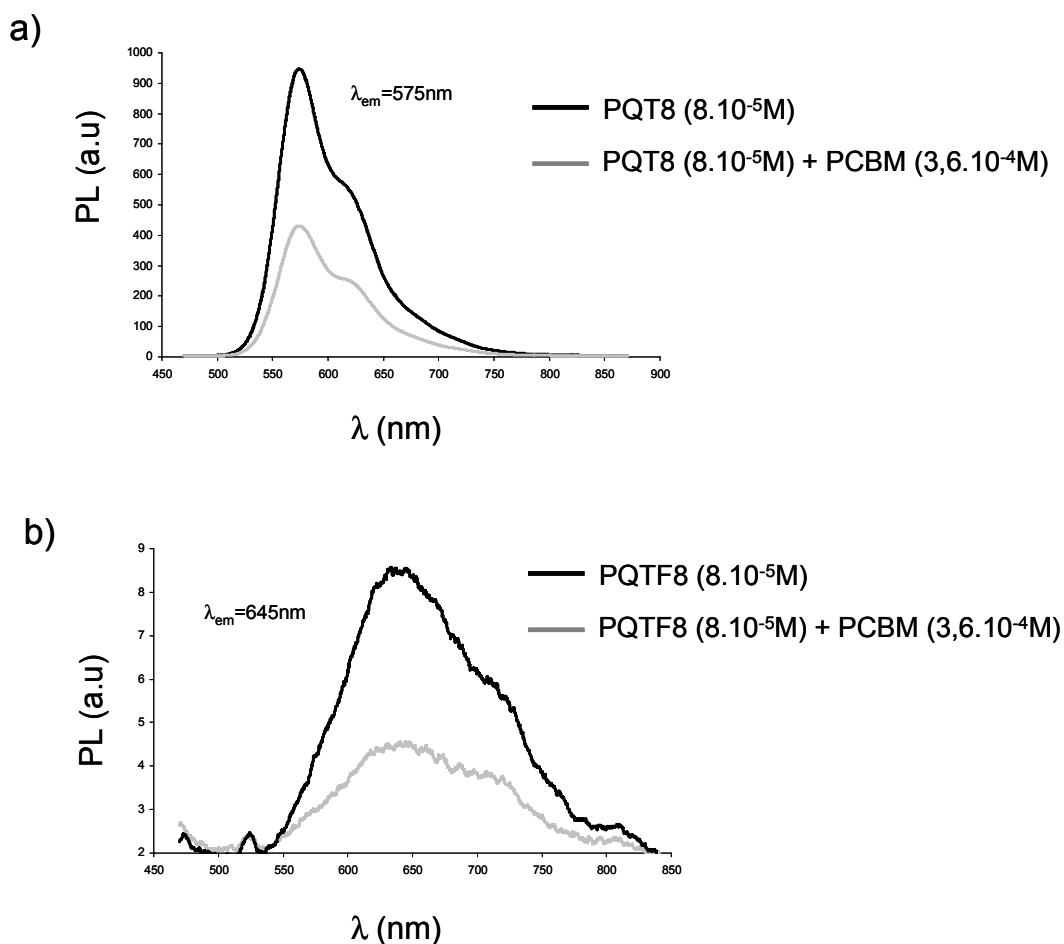

Supplement: b708372f.pdf [file b708372f.pdf]
